# Supplementary material for: Multi-target cryoprotection of gelatin-tea polyphenol compounds on surimi through ice inhibition and component stabilization
Source: Research Square preprint supplement (doi:10.21203/rs.3.rs-7475396/v1), 2025-09-05
Supplement: Supplementary file 1 [file 766411c8183bfc898a43c377.docx]

Supplementary Materials

**Multi-target cryoprotection of** **gelatin-tea polyphenol compounds on surimi through ice inhibition and component stabilization**

Shichen Zhua*, Ningning Penga, Xuan Wanga, Yan Jina, Yuting Dinga,b, Shulai Liua, Xuxia Zhoua*

a Key Laboratory of Green, Low-carbon and Efficient Development of Marine Fishery Resources, National R&D Branch Center for Pelagic Aquatic Products Processing (Hangzhou), College of Food Science and Technology, Zhejiang University of Technology, Hangzhou 310014, Zhejiang, China

b Food Science Research Institute of Zhangzhou, Zhangzhou 363000, Fujian, China

*Corresponding author

E-mail: xzhou@zjut.edu.cn; [zhusc@zjut.edu.cn](mailto:zhusc@zjut.edu.cn);

**Fig. S1** SEM of gelatin-tea polyphenol compounds with different mass ratios

**Fig. S2** Freezing diagram of gelatin-tea polyphenol compounds

**Fig. S3** Isualization of gel strength (A) and viscosity change (B) of gelatin-tea polyphenol compounds with different mass ratios

**Figure S1**

**
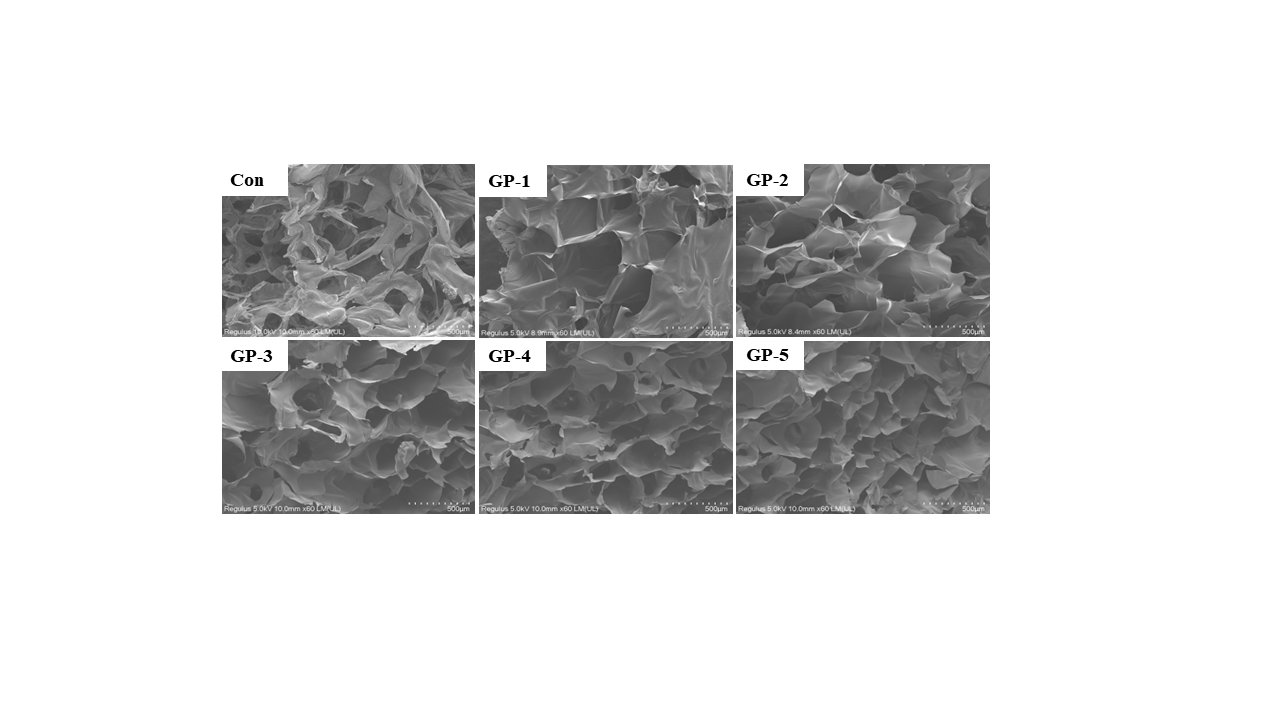
**

**Fig. S1** SEM of gelatin-tea polyphenol compounds with different mass ratios

**Figure S2**


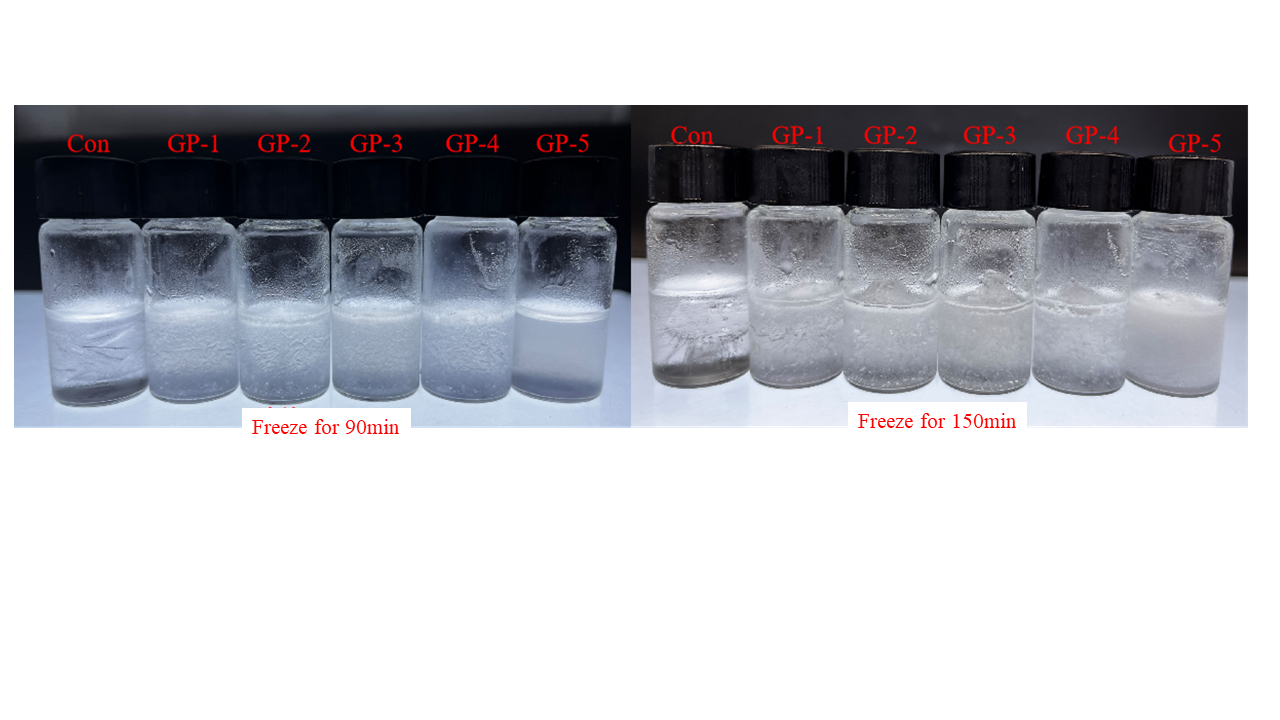


**Fig. S2** Freezing diagram of gelatin-tea polyphenol compounds

**Figure S3**


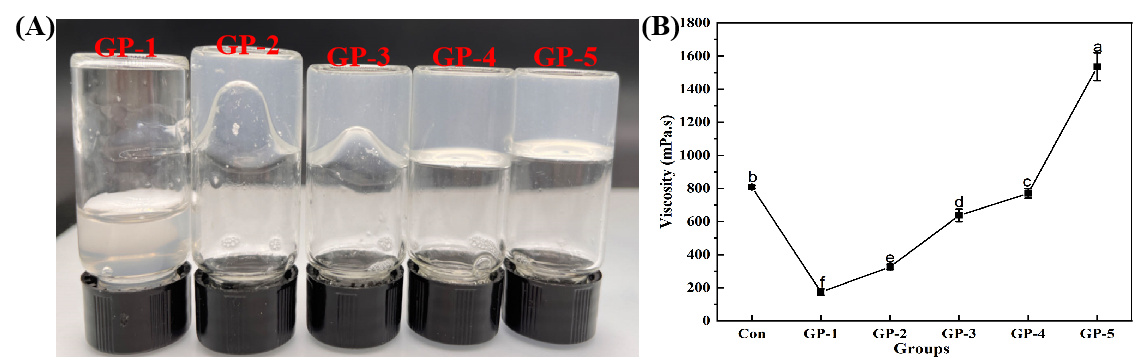


**Fig. S3** Isualization of gel strength (A) and viscosity change (B) of gelatin-tea polyphenol compounds with different mass ratios
